# Supplementary material for: Aqueous leaching of lithium from simulated pyrometallurgical slag by sodium sulfate roasting
Source: Royal Society of Chemistry journal article supplement (doi:10.1039/c9ra03754c), 2019-01-01
Supplement: c9ra03754c1.pdf [file c9ra03754c1.pdf]

## Supporting Information

### Aqueous leaching of lithium from simulated pyrometallurgical slag by sodium sulfate roasting

Na Li<sup>a</sup>, Jiahui Guo<sup>a</sup>, Zhidong Chang\*<sup>a</sup>, Hui Dang<sup>a</sup>, Xin Zhao<sup>a</sup>, Shujaat Ali<sup>b</sup>, Wenjun Li<sup>a</sup>,  
Hualei Zhou<sup>a</sup>, Changyan Sun<sup>a</sup>

a. School of Chemistry and Biological Engineering, University of Science and Technology Beijing, Beijing 100083, PR China.

b. Women University Swabi, 23430, KPK, Pakistan.

The concentration of Lithium was measured by the atomic absorption spectrophotometer (AAS, AA 6800, Shimadzu, Japan) at the wavelength of 670.8 nm with a current of 8 mA. 2.0 g of the roasted product was leached by water in the batch experiment.

Table S1. Lithium concentration (ppm) in leaching solution (roasting time of 60 min was fixed, and leaching conditions are fixed as follows: liquid to solid (L/S) mass ratio of 20:1, leaching temperature of 25°C and leaching time of 60 min).

|     | 500°C | 550°C | 600°C | 650°C  | 700°C  | 750°C  | 800°C  | 850°C  | 900°C  |
|-----|-------|-------|-------|--------|--------|--------|--------|--------|--------|
| 1:1 | 32.31 | 37.95 | 74.93 | 239.65 | 346.02 | 549.38 | 702.02 | 294.42 | 137.40 |
| 2:1 | 26.80 | 35.50 | 79.96 | 196.13 | 308.93 | 492.73 | 638.33 | 336.74 | 174.72 |
| 3:1 | 27.48 | 37.55 | 70.87 | 186.27 | 269.49 | 466.09 | 632.41 | 318.53 | 193.96 |
| 4:1 | 23.89 | 26.04 | 61.52 | 203.12 | 246.61 | 404.48 | 534.71 | 293.32 | 185.53 |

Table S2. Lithium concentration (ppm) in leaching solution (molar ratio of Na<sub>2</sub>SO<sub>4</sub>/Li (3:1) was fixed, and leaching conditions are fixed as follows: liquid to solid (L/S) mass ratio of 20:1, leaching temperature of 25°C and leaching time of 60 min).

|       | 20min  | 40min  | 60min  | 80min  | 100min | 120min |
|-------|--------|--------|--------|--------|--------|--------|
| 750°C | 345.50 | 375.54 | 466.09 | 262.88 | 225.32 | 172.75 |
| 800°C | 458.19 | 506.13 | 632.41 | 409.68 | 355.70 | 280.51 |
| 850°C | 157.73 | 262.88 | 318.53 | 195.28 | 180.26 | 142.71 |

Table S3. Lithium concentration (ppm) in leaching solution (the L/S mass ratio of 20:1, leaching time of 60 min

and roasting conditions ( $\text{Na}_2\text{SO}_4/\text{Li}$  molar ratio of 3:1, roasting temperature of  $800^\circ\text{C}$  for 60 min) are fixed.

|                       |        |        |        |        |        |        |        |
|-----------------------|--------|--------|--------|--------|--------|--------|--------|
| T( $^\circ\text{C}$ ) | 30     | 40     | 50     | 60     | 70     | 80     | 90     |
| C(ppm)                | 637.43 | 640.43 | 649.09 | 664.33 | 682.66 | 682.73 | 681.23 |

Table S4. Lithium concentration (ppm) in leaching solution (the L/S mass ratio of 20:1, leaching temperature of  $70^\circ\text{C}$  and roasting conditions ( $\text{Na}_2\text{SO}_4/\text{Li}$  molar ratio of 3:1, roasting temperature of  $800^\circ\text{C}$  for 60 min) are fixed.

|         |        |        |        |        |        |        |
|---------|--------|--------|--------|--------|--------|--------|
| t (min) | 20     | 40     | 60     | 80     | 100    | 120    |
| C(ppm)  | 647.72 | 659.82 | 682.66 | 690.92 | 687.99 | 689.49 |

Table S5. Lithium concentration (ppm) in leaching solution (the leaching temperature of  $70^\circ\text{C}$ , leaching time of 80 min and roasting conditions ( $\text{Na}_2\text{SO}_4/\text{Li}$  molar ratio of 3:1, roasting temperature of  $800^\circ\text{C}$  for 60 min) are fixed.

|        |        |        |        |        |       |
|--------|--------|--------|--------|--------|-------|
| L/S    | 10     | 20     | 30     | 40     | 50    |
| C(ppm) | 641.35 | 690.85 | 703.16 | 703.84 | 703.0 |
